# Supplementary material for: [Retracted] The RPL4P4 Pseudogene Is a Prognostic Biomarker and Is Associated with Immune Infiltration in Glioma
Source: Hindawi journal article supplement (doi:10.1155/2022/7967722), 2022-01-01
Supplement: f2 [file 7967722.f2.pdf]

**STable 1** The correlation between RPL4P4 and clinicpathologic characteristic in CCGA-glioma dataset.

| Characteristic                                      | Low expression of RPL4P4 | High expression of RPL4P4 | p                 |
|-----------------------------------------------------|--------------------------|---------------------------|-------------------|
| n                                                   | 481                      | 498                       |                   |
| <b>Grade, n (%)</b>                                 |                          |                           | <b>&lt; 0.001</b> |
| G2                                                  | 111 (11.4%)              | 164 (16.8%)               |                   |
| G3                                                  | 133 (13.6%)              | 192 (19.7%)               |                   |
| G4                                                  | 237 (24.3%)              | 138 (14.2%)               |                   |
| <b>IDH status, n (%)</b>                            |                          |                           | <b>&lt; 0.001</b> |
| Mut                                                 | 163 (17.5%)              | 344 (37%)                 |                   |
| WT                                                  | 296 (31.8%)              | 127 (13.7%)               |                   |
| <b>1p/19q codeletion, n (%)</b>                     |                          |                           | <b>&lt; 0.001</b> |
| Codel                                               | 42 (4.6%)                | 161 (17.8%)               |                   |
| Non-codel                                           | 373 (41.2%)              | 329 (36.4%)               |                   |
| <b>PRS_type, n (%)</b>                              |                          |                           | <b>0.362</b>      |
| Primary                                             | 318 (32.6%)              | 312 (32%)                 |                   |
| Recurrent                                           | 152 (15.6%)              | 164 (16.8%)               |                   |
| Secondary                                           | 11 (1.1%)                | 18 (1.8%)                 |                   |
| <b>MGMTp_methylation_status, n (%)</b>              |                          |                           | <b>0.002</b>      |
| methyalted                                          | 200 (24.3%)              | 259 (31.5%)               |                   |
| un-methyalted                                       | 199 (24.2%)              | 164 (20%)                 |                   |
| <b>Age, median (IQR)</b>                            | <b>45 (37.75, 54.25)</b> | <b>41 (34, 49)</b>        | <b>&lt; 0.001</b> |
| <b>Gender, n (%)</b>                                |                          |                           | <b>0.027</b>      |
| Female                                              | 180 (18.4%)              | 221 (22.6%)               |                   |
| Male                                                | 301 (30.7%)              | 276 (28.2%)               |                   |
| <b>Radio_status (treated=1;un-treated=0), n (%)</b> |                          |                           | <b>0.080</b>      |
| 0                                                   | 106 (11.2%)              | 87 (9.2%)                 |                   |
| 1                                                   | 357 (37.8%)              | 394 (41.7%)               |                   |

**STable 1** The correlation between RPL4P4 and clinicpathologic characteristic in CCGA-glioma dataset.

| Characteristic                                   | Low expression of RPL4P4 | High expression of RPL4P4 | p     |
|--------------------------------------------------|--------------------------|---------------------------|-------|
| Chemo_status (TMZ treated=1;un-treated=0), n (%) |                          |                           | 0.772 |
| 0                                                | 130 (13.8%)              | 139 (14.7%)               |       |
| 1                                                | 335 (35.5%)              | 340 (36%)                 |       |
