# Supplementary material for: [Retracted] The RPL4P4 Pseudogene Is a Prognostic Biomarker and Is Associated with Immune Infiltration in Glioma
Source: Hindawi journal article supplement (doi:10.1155/2022/7967722), 2022-01-01
Supplement: f3 [file 7967722.f3.pdf]

**Table 2** Univariate regression and multivariate survival model of DFS in patients with glioma.

| Characteristics                | Total(N) | Univariate analysis    |                  | Multivariate analysis |                  |
|--------------------------------|----------|------------------------|------------------|-----------------------|------------------|
|                                |          | Hazard ratio (95% CI)  | P value          | Hazard ratio (95% CI) | P value          |
| <b>WHO grade</b>               | 614      |                        |                  |                       |                  |
| G2                             | 220      |                        |                  |                       |                  |
| G3                             | 239      | 3.098 (2.023-4.744)    | <b>&lt;0.001</b> | 1.675 (0.955-2.936)   | 0.072            |
| G4                             | 155      | 19.243 (12.572-29.455) | <b>&lt;0.001</b> | 4.165 (0.926-18.731)  | 0.063            |
| <b>1p/19q codeletion</b>       | 668      |                        |                  |                       |                  |
| codel                          | 169      |                        |                  |                       |                  |
| non-codel                      | 499      | 4.987 (3.117-7.978)    | <b>&lt;0.001</b> | 1.067 (0.500-2.276)   | 0.867            |
| <b>Primary therapy outcome</b> | 255      |                        |                  |                       |                  |
| SD                             | 144      |                        |                  |                       |                  |
| PD                             | 111      | 2.705 (1.757-4.165)    | <b>&lt;0.001</b> | 3.703 (2.120-6.468)   | <b>&lt;0.001</b> |
| <b>RPL4P4</b>                  | 674      |                        |                  |                       |                  |
| Low                            | 340      |                        |                  |                       |                  |
| High                           | 334      | 2.360 (1.809-3.080)    | <b>&lt;0.001</b> | 1.150 (0.672-1.965)   | 0.611            |
| <b>IDH status</b>              | 664      |                        |                  |                       |                  |
| Mut                            | 432      |                        |                  |                       |                  |
| WT                             | 232      | 9.055 (6.833-12.000)   | <b>&lt;0.001</b> | 2.350 (1.178-4.691)   | <b>0.015</b>     |
| <b>Age</b>                     | 674      |                        |                  |                       |                  |
| >60                            | 133      |                        |                  |                       |                  |

**S**Table 2 Univariate regression and multivariate survival model of DFS in patients with glioma.

| Characteristics          | Total(N) | Univariate analysis   |                  | Multivariate analysis |                  |
|--------------------------|----------|-----------------------|------------------|-----------------------|------------------|
|                          |          | Hazard ratio (95% CI) | P value          | Hazard ratio (95% CI) | P value          |
| <=60                     | 541      | 0.222 (0.168-0.293)   | <b>&lt;0.001</b> | 0.335 (0.191-0.589)   | <b>&lt;0.001</b> |
| <b>Histological type</b> | 674      |                       |                  |                       |                  |
| Astrocytoma              | 192      |                       |                  |                       |                  |
| Oligoastrocytoma         | 132      | 0.604 (0.374-0.975)   | <b>0.039</b>     | 1.375 (0.755-2.501)   | 0.298            |
| Oligodendroglioma        | 195      | 0.543 (0.363-0.813)   | <b>0.003</b>     | 0.614 (0.331-1.138)   | 0.121            |
| Glioblastoma             | 155      | 6.602 (4.739-9.197)   | <b>&lt;0.001</b> |                       |                  |
| <b>Gender</b>            | 674      |                       |                  |                       |                  |
| Female                   | 289      |                       |                  |                       |                  |
| Male                     | 385      | 1.248 (0.965-1.614)   | 0.092            | 1.750 (1.064-2.878)   | <b>0.028</b>     |
