# Supplementary material for: [Retracted] The RPL4P4 Pseudogene Is a Prognostic Biomarker and Is Associated with Immune Infiltration in Glioma
Source: Hindawi journal article supplement (doi:10.1155/2022/7967722), 2022-01-01
Supplement: f4 [file 7967722.f4.pdf]

**STable 3** Univariate regression and multivariate survival model of PFS in patients with glioma.

| Characteristics                | Total(N) | Univariate analysis   |                  | Multivariate analysis |                  |
|--------------------------------|----------|-----------------------|------------------|-----------------------|------------------|
|                                |          | Hazard ratio (95% CI) | P value          | Hazard ratio (95% CI) | P value          |
| <b>WHO grade</b>               | 634      |                       |                  |                       |                  |
| G2                             | 223      |                       |                  |                       |                  |
| G3                             | 243      | 1.616 (1.197-2.182)   | <b>0.002</b>     | 1.286 (0.840-1.969)   | 0.247            |
| G4                             | 168      | 7.865 (5.808-10.649)  | <b>&lt;0.001</b> | 1.988 (0.520-7.611)   | 0.316            |
| <b>1p/19q codeletion</b>       | 688      |                       |                  |                       |                  |
| codel                          | 170      |                       |                  |                       |                  |
| non-codel                      | 518      | 3.373 (2.438-4.666)   | <b>&lt;0.001</b> | 1.045 (0.597-1.830)   | 0.876            |
| <b>Primary therapy outcome</b> | 259      |                       |                  |                       |                  |
| SD                             | 147      |                       |                  |                       |                  |
| PD                             | 112      | 3.826 (2.700-5.421)   | <b>&lt;0.001</b> | 4.146 (2.740-6.274)   | <b>&lt;0.001</b> |
| <b>RPL4P4</b>                  | 695      |                       |                  |                       |                  |
| Low                            | 348      |                       |                  |                       |                  |
| High                           | 347      | 1.588 (1.282-1.967)   | <b>&lt;0.001</b> | 1.019 (0.682-1.521)   | 0.928            |
| <b>IDH status</b>              | 685      |                       |                  |                       |                  |
| Mut                            | 439      |                       |                  |                       |                  |
| WT                             | 246      | 6.627 (5.231-8.396)   | <b>&lt;0.001</b> | 2.886 (1.714-4.858)   | <b>&lt;0.001</b> |
| <b>Age</b>                     | 695      |                       |                  |                       |                  |
| >60                            | 143      |                       |                  |                       |                  |

**S**Table 3 Univariate regression and multivariate survival model of PFS in patients with glioma.

| Characteristics          | Total(N) | Univariate analysis   |                | Multivariate analysis |              |
|--------------------------|----------|-----------------------|----------------|-----------------------|--------------|
|                          |          | Hazard ratio (95% CI) | P value        | Hazard ratio (95% CI) | P value      |
| <=60                     | 552      | 0.348 (0.275-0.441)   | < <b>0.001</b> | 0.527 (0.336-0.826)   | <b>0.005</b> |
| <b>Histological type</b> | 695      |                       |                |                       |              |
| Astrocytoma              | 195      |                       |                |                       |              |
| Oligoastrocytoma         | 134      | 0.578 (0.401-0.832)   | <b>0.003</b>   | 1.134 (0.699-1.839)   | 0.611        |
| Oligodendroglioma        | 198      | 0.638 (0.469-0.868)   | <b>0.004</b>   | 0.599 (0.364-0.984)   | <b>0.043</b> |
| Glioblastoma             | 168      | 4.416 (3.353-5.816)   | < <b>0.001</b> |                       |              |
| <b>Gender</b>            | 695      |                       |                |                       |              |
| Female                   | 297      | Reference             |                |                       |              |
| Male                     | 398      | 1.083 (0.875-1.342)   | 0.463          |                       |              |
