# Supplementary figures and images for: [Retracted] The RPL4P4 Pseudogene Is a Prognostic Biomarker and Is Associated with Immune Infiltration in Glioma
Source: Hindawi journal article supplement (doi:10.1155/2022/7967722), 2022-01-01

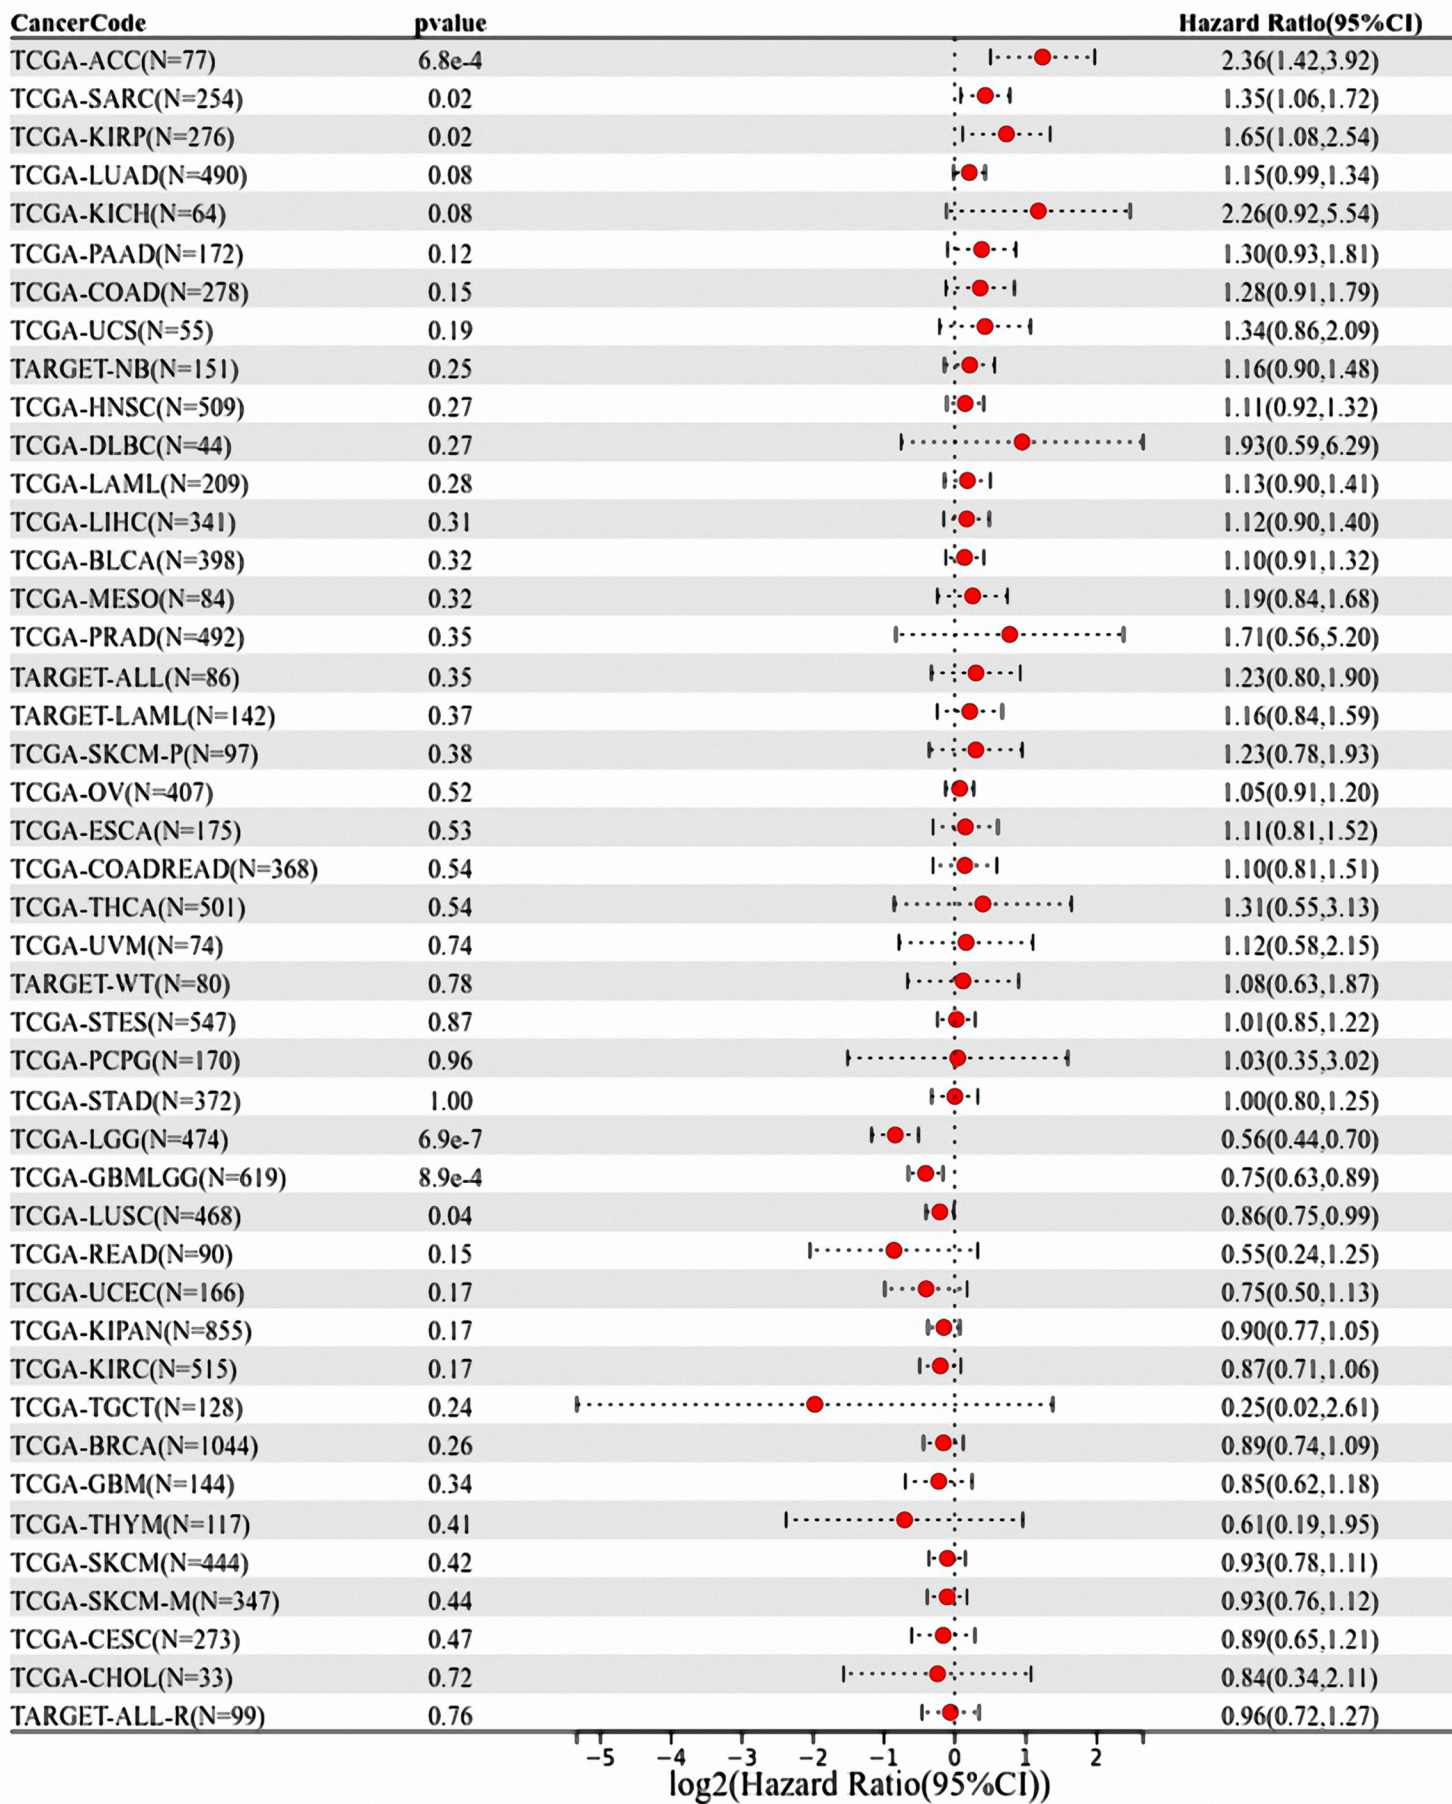

Supplement: f1 [file 7967722.f1.pdf]
